# Supplementary material
Source: Research Square preprint supplement (doi:10.21203/rs.3.rs-9476681/v1)
Supplement: Supplementary file 1 [file 4ddaa7920a302bce0b5b27e2.pdf]

| Sampe ID                          | River                 | Location         | Sampling Date | Latitude | Longitude | ConAC/OC (%) | ConAC-F <sup>14</sup> C | ConAC-F <sup>14</sup> C SD | ConAC-F <sup>14</sup> C Age | ETHIS      | OC (%) | OC-F <sup>14</sup> C | OC-F <sup>14</sup> C SD | OC-F <sup>14</sup> C age | Comment                                    |
|-----------------------------------|-----------------------|------------------|---------------|----------|-----------|--------------|-------------------------|----------------------------|-----------------------------|------------|--------|----------------------|-------------------------|--------------------------|--------------------------------------------|
| <b>Riverine particulate ConAC</b> |                       |                  |               |          |           |              |                         |                            |                             |            |        |                      |                         |                          |                                            |
| CAN18-32                          | Arctic Red River      | Tsiigehtshik     | 2018          | 67.4263  | -133.7789 | 3.95         | -                       | -                          | -                           | -          | 1.91   | 0.351                | 0.004                   | 8410                     | Bulk OC values are from Schwab et al. 2022 |
| CAN09-49                          | Arctic Red River      | Tsiigehtshik     | 2009          | 67.4430  | -133.7490 | 21.41        | 0.057                   | 0.035                      | 23012                       | 96475.1.1  | -      | 0.229                | -                       | 11841                    | Bulk OC values are from Hilton et al. 2015 |
| CAN17-31                          | Arctic Red River      | Tsiigehtshik     | 2017          | 67.4308  | -133.7820 | 18.37        | -                       | -                          | -                           | -          | 1.55   | 0.302                | 0.004                   | 9618                     | Bulk OC values are from Schwab et al. 2022 |
| CAN10-17                          | Arctic Red River      | Tsiigehtshik     | 2010          | 67.4430  | -133.7490 | 25.58        | 0.025                   | -                          | 29633                       | 100878.1.1 | 2.17   | 0.299                | -                       | 9698                     | Bulk OC values are from Hilton et al. 2015 |
| CAN17-24                          | Arctic Red River      | Tsiigehtshik     | 2017          | 67.4287  | -133.7780 | 14.61        | -                       | -                          | -                           | -          | 0.72   | 0.142                | 0.003                   | 15680                    | Bulk OC values are from Schwab et al. 2022 |
| CAN18-64                          | Arctic Red River      | Tsiigehtshik     | 2018          | 67.4269  | -133.7793 | 3.95         | -                       | -                          | -                           | -          | 2.44   | 0.519                | 0.006                   | 5268                     | Bulk OC values are from Schwab et al. 2022 |
| CAN11-03                          | Liard River           | Fort Simpson     | 2011          | 61.8234  | -121.2976 | 20.73        | -                       | -                          | -                           | -          | 1.43   | 0.481                | -                       | 5879                     | Bulk OC values are from Hilton et al. 2015 |
| CAN11-07                          | Liard River           | Fort Simpson     | 2011          | 61.8234  | -121.2976 | 7.91         | 0.079                   | 0.036                      | 20390                       | 96478.1.1  | 1.47   | 0.452                | -                       | 6379                     | Bulk OC values are from Hilton et al. 2015 |
| CAN11-05                          | Liard River           | Fort Simpson     | 2011          | 61.8234  | -121.2976 | 11.86        | -                       | -                          | -                           | -          | 1.51   | 0.465                | -                       | 6151                     | Bulk OC values are from Hilton et al. 2015 |
| CAN09-12                          | Liard River           | Fort Simpson     | 2009          | 61.8446  | -121.3163 | 7.51         | 0.079                   | 0.026                      | 20390                       | 96473.1.1  | 0.66   | 0.364                | 0.002                   | 8118                     | Bulk OC values are from Hilton et al. 2015 |
| CAN09-55                          | Mackenzie River       | Tsiigehtshik     | 2009          | 67.4538  | -133.7074 | 11.86        | 0.090                   | 0.024                      | 19343                       | 96477.1.1  | 1.5    | 0.217                | 0.001                   | 12273                    | Bulk OC values are from Hilton et al. 2015 |
| CAN11-68                          | Mackenzie River       | Tsiigehtshik     | 2011          | 67.4680  | -133.6850 | 14.96        | 0.026                   | -                          | 29318                       | 100879.1.1 | 1.54   | 0.451                | -                       | 6397                     | Bulk OC values are from Hilton et al. 2015 |
| CAN17-24                          | Mackenzie River       | Tsiigehtshik     | 2017          | 67.4503  | -133.7208 | 10.19        | 0.217                   | 0.018                      | 12273                       | 96479.1.1  | 0.61   | 0.457                | 0.004                   | 6290                     | Bulk OC values are from Schwab et al. 2022 |
| CAN09-54                          | Mackenzie River       | Tsiigehtshik     | 2009          | 67.4538  | -133.7074 | 15.90        | -                       | -                          | -                           | -          | 1.06   | 0.371                | 0.001                   | 7965                     | Bulk OC values are from Hilton et al. 2015 |
| CAN18-03                          | Mackenzie River Delta | Middle Channel   | 2018          | 68.4171  | -134.1150 | 5.93         | -                       | -                          | -                           | -          | 1.7    | 0.528                | 0.005                   | 5130                     | Bulk OC values are from Schwab et al. 2022 |
| CAN11-89                          | Mackenzie River Delta | Middle Channel   | 2011          | 67.4538  | -133.7074 | 15.00        | 0.090                   | 0.024                      | 19343                       | -          | 1.54   | 0.401                | -                       | 7341                     | Bulk OC values are from Hilton et al. 2015 |
| CAN11-87                          | Mackenzie River Delta | Middle Channel   | 2011          | 68.4580  | -134.1810 | 25.58        | 0.027                   | -                          | 29015                       | 100880.1.1 | 2.71   | 0.568                | -                       | 4544                     | Bulk OC values are from Hilton et al. 2015 |
| CAN11-88                          | Mackenzie River Delta | Middle Channel   | 2011          | 68.4580  | -134.1810 | 20.73        | 0.156                   | 0.020                      | 14925                       | 96476.1.1  | 1      | 0.366                | -                       | 8074                     | Bulk OC values are from Hilton et al. 2015 |
| CAN17-11                          | Mackenzie River Delta | Middle Channel   | 2017          | 68.4136  | -134.1153 | 21.19        | -                       | -                          | -                           | -          | 0.97   | 0.451                | 0.005                   | 6397                     | Bulk OC values are from Schwab et al. 2022 |
| CAN17-54                          | Mackenzie River Delta | Middle Channel   | 2017          | 68.4148  | -134.1255 | 15.69        | 0.033                   | -                          | 27403                       | 100885.1.1 | 1.02   | 0.419                | 0.004                   | 6988                     | Bulk OC values are from Schwab et al. 2022 |
| GS2-3                             | Mackenzie River Delta | Middle Channel   | 1987          | 69.1700  | -135.0270 | 14.32        | 0.174                   | -                          | 14047                       | -          | 1.14   | 0.394                | -                       | 7482                     | Bulk OC values are from Vonk et al. 2015   |
| GS3-2                             | Mackenzie River Delta | Reindeer Channel | 1987          | 68.8900  | -135.0300 | 11.43        | 0.014                   | 0.028                      | 34290                       | 100886.1.1 | 1.54   | 0.466                | -                       | 6134                     | Bulk OC values are from Vonk et al. 2015   |
| GS1-1                             | Mackenzie River Delta | East Channel     | 1987          | 69.0070  | -134.6330 | 7.91         | 0.108                   | -                          | 17878                       | -          | 0.49   | 0.341                | -                       | 8642                     | Bulk OC values are from Vonk et al. 2015   |
| CAN09-42                          | Peel River            | Fort McPherson   | 2009          | 67.3319  | -134.8691 | 14.70        | 0.082                   | 0.022                      | 20091                       | 96474.1.1  | 1.63   | 0.328                | 0.002                   | 8955                     | Bulk OC values are from Hilton et al. 2015 |
| CAN17-40                          | Peel River            | Fort McPherson   | 2017          | 67.3283  | -134.8676 | 27.63        | 0.032                   | -                          | 27650                       | 100884.1.1 | 0.74   | 0.151                | 0.003                   | 15186                    | Bulk OC values are from Schwab et al. 2022 |
| <b>Riverine dissolved ConAC</b>   |                       |                  |               |          |           |              |                         |                            |                             |            |        |                      |                         |                          |                                            |
| CAN18-38                          | Arctic Red River      | Tsiigehtshik     | 2018          | 67.4265  | -133.7790 | 17.22        | 0.867                   | -                          | 1146                        | 100890.1.1 | 5.86   | 0.970                | 0.030                   | 245                      | Bulk OC values are from Schwab et al. 2022 |
| CAN18-31                          | Mackenzie River       | Tsiigehtshik     | 2018          | 67.4562  | -133.7234 | 16.64        | -                       | -                          | -                           | -          | 5.46   | 0.990                | 0.025                   | 81                       | Bulk OC values are from Schwab et al. 2022 |
| CAN18-02                          | Mackenzie River Delta | Middle Channel   | 2018          | 68.4178  | -134.1116 | 3.89         | -                       | -                          | -                           | -          | 9.44   | 0.610                | 0.014                   | 3971                     | Bulk OC values are from Schwab et al. 2022 |
| CAN18-14                          | Mackenzie River Delta | Middle Channel   | 2018          | 68.4171  | -134.1150 | 27.77        | -                       | -                          | -                           | -          | 6.60   | 0.930                | 0.022                   | 583                      | Bulk OC values are from Schwab et al. 2022 |
| <b>Shelf particulate ConAC</b>    |                       |                  |               |          |           |              |                         |                            |                             |            |        |                      |                         |                          |                                            |
| GS3-2                             | Shelf                 | Mackenzie Shelf  | 1987          | 69.3870  | -138.1330 | 20.27        | 0.144                   | -                          | 15567                       | -          | 1.35   | 0.341                | -                       | 8642                     | Bulk OC values are from Vonk et al. 2015   |

#### References

Hilton, R. G. et al. Erosion of organic carbon in the Arctic as a geological carbon dioxide sink. *Nature* 524, 84–87 (2015).  
Schwab, M. S., Hilton, R. G., Haghpor, N., Baronas, J. J. & Eglinton, T. I. Vegetal Undercurrents—Obscured Riverine Dynamics of Plant Debris. *J. Geophys Res Biogeosci* 127, e2021JG006726 (2022).  
Vonk, J. E. et al. Spatial variations in geochemical characteristics of the modern Mackenzie Delta sedimentary system. *Geochim Cosmochim Acta* 171, 100–120 (2015).
